# Supplementary material for: Single-cell analysis of gastric signet ring cell carcinoma reveals cytological and immune microenvironment features
Source: PubMed Central journal article supplement (PMC10209160; doi:10.1038/s41467-023-38426-4), 2023-05-24
Supplement: 41467_2023_38426_MOESM3_ESM.pdf [file 41467_2023_38426_MOESM3_ESM.pdf]

### **Description of Additional Supplementary Files**

File Name: Supplementary Data 1

Description: GSVA of nonmalignant epithelial cells and adenocarcinoma cells
