# Supplementary material for: Single-cell analysis of gastric signet ring cell carcinoma reveals cytological and immune microenvironment features
Source: Nat Commun. 2023 May 24;14:2985. doi: 10.1038/s41467-023-38426-4 (PMC10209160; doi:10.1038/s41467-023-38426-4)
Supplement: Supplementary file 1 — Supplementary Information [file 41467_2023_38426_MOESM1_ESM.pdf]

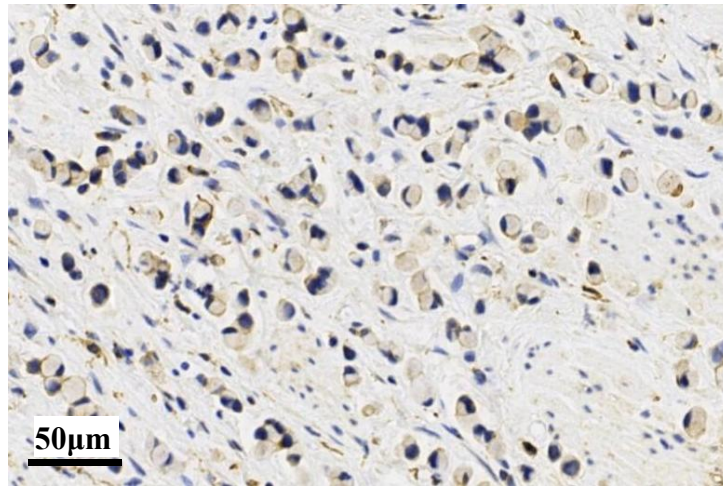

**Figure S1. The positive expression of EpCAM in GSRC.** EpCAM is mainly expressed in the cell membranous and partly in the cytoplasmic (n=30). Scale bar: 50μm.

inferCNV

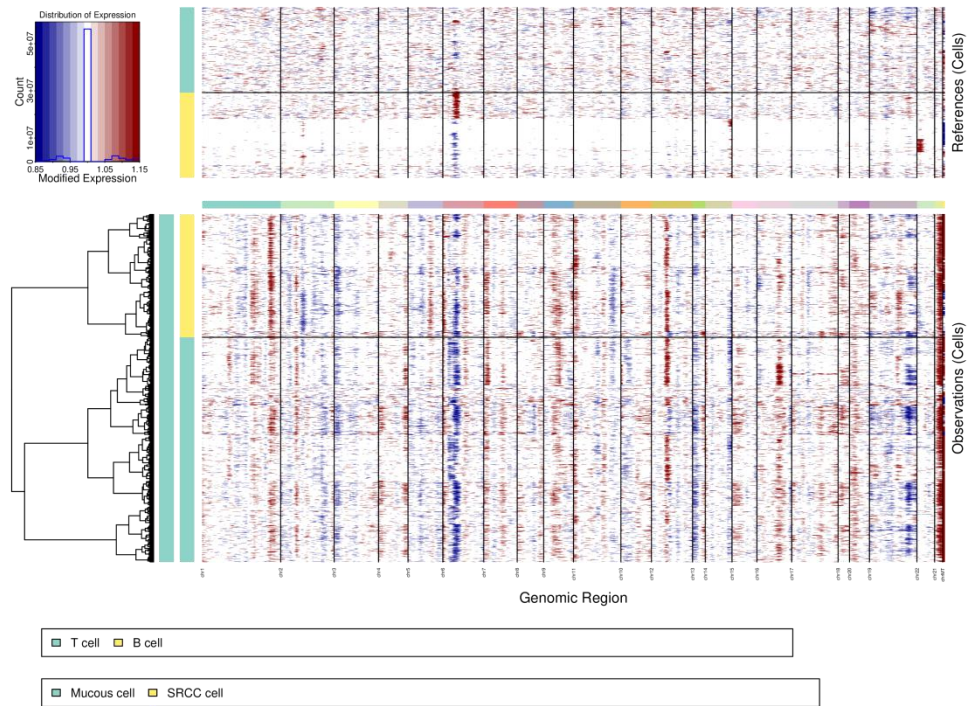

**Figure S2 Heatmap showing large-scale copy number variation for each subclusters of mucous cells and SRCC cells. Red: amplifications; blue: deletions. Source data are provided as a Source Data file.**

a

## Single Cell Volcano Plot

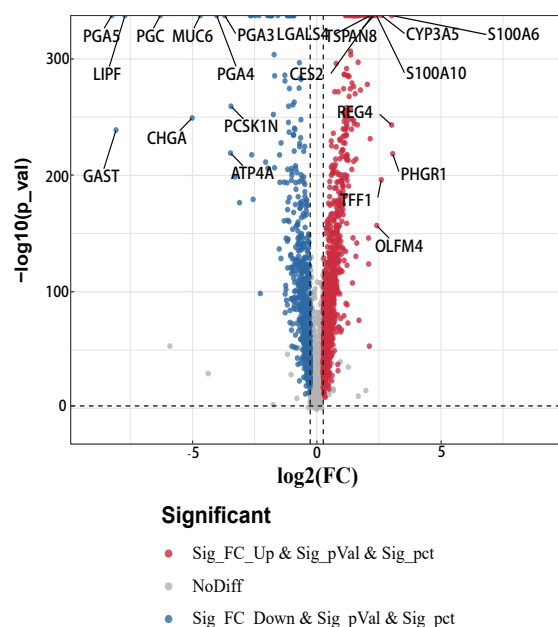

b

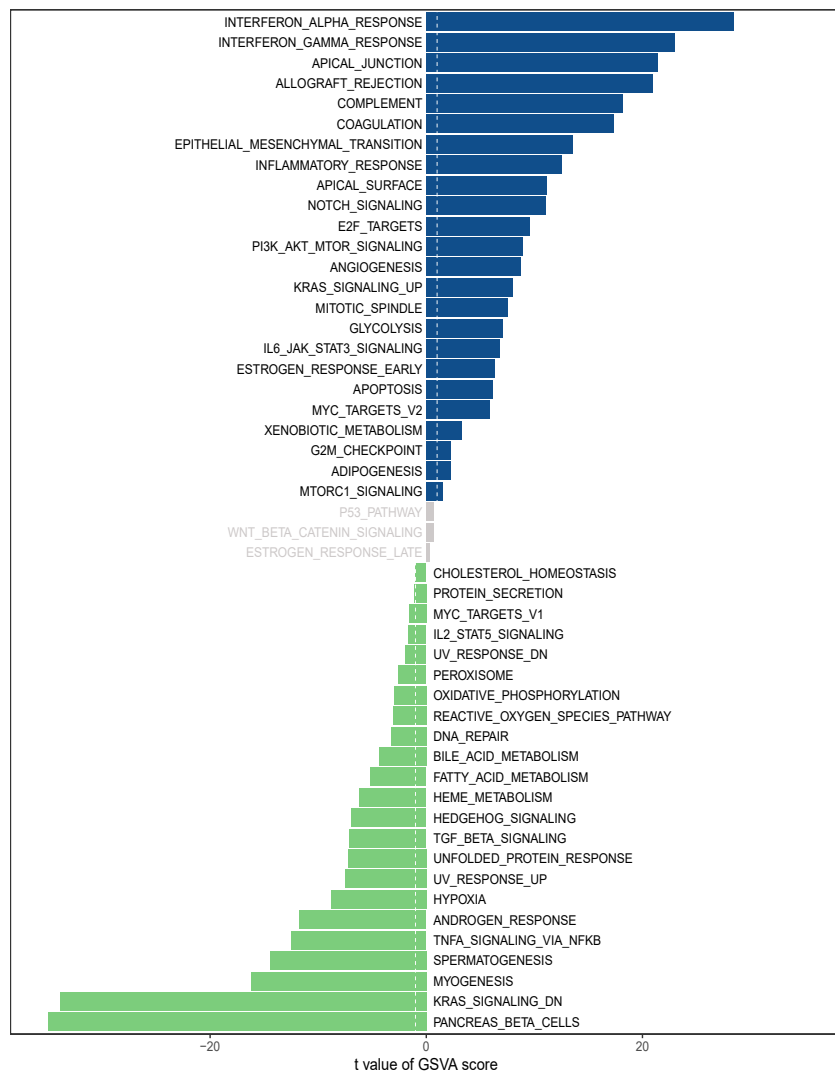

**Figure S3 Differentially expressed genes and GSVA between nonmalignant epithelial cells and M/PDA cells. a** Volcano plot of differentially expressed genes between nonmalignant epithelial cells and M/PDA cells. **b** GSVA of nonmalignant epithelial cells and adenocarcinoma cells. M/DPA cells were mainly enriched in cancer-related signalling pathways, such as epithelial-mesenchymal transition, E2F targets, PI3K/AKT/mTOR signalling, KRAS signalling, etc. GSVA data were plotted according to the t value of limma, and at value > 5 was considered significant. The statistical strategy were two-sided Student's t-test. Source data are provided as a Source Data file.

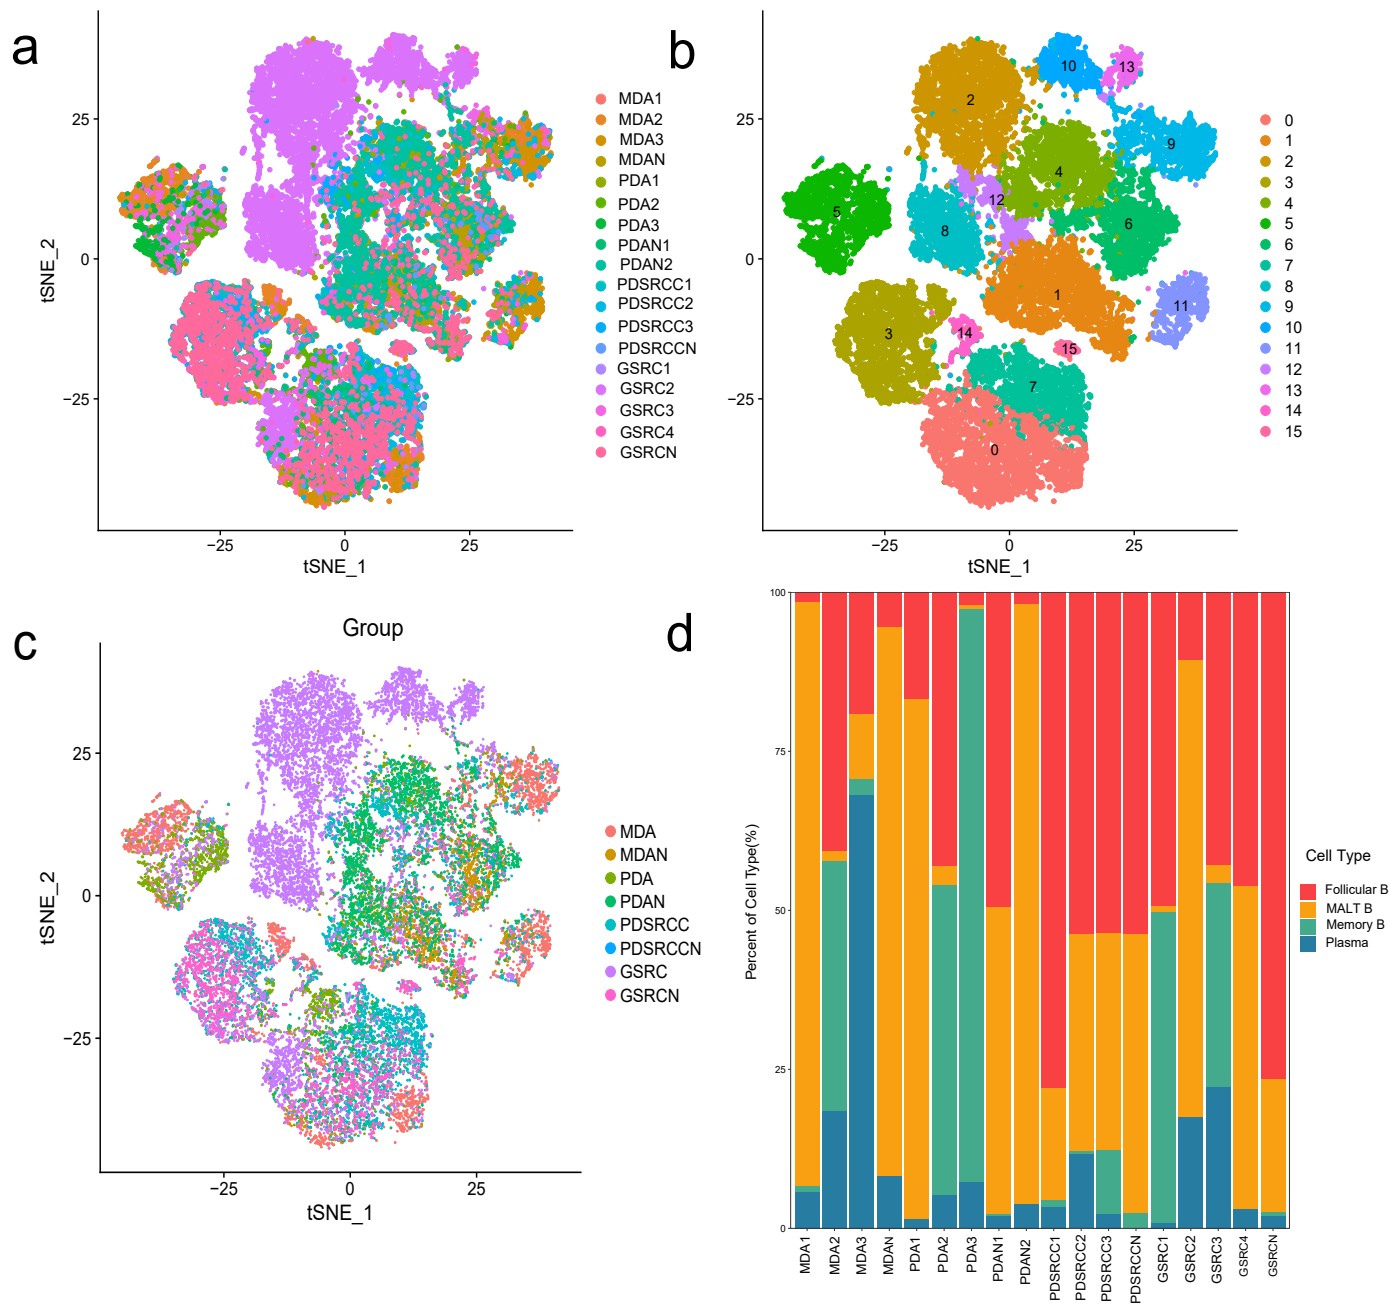

**Figure S4 Classification plots of B cells.** **a** tSNE plots showing subclusters of B cells (coloured by sample origin). **b** tSNE plots showing subclusters of B cells. **c** tSNE plots showing subclusters of B cells (coloured by grope). **d** Scale plot of subclusters of B cells. Source data are provided as a Source Data file.

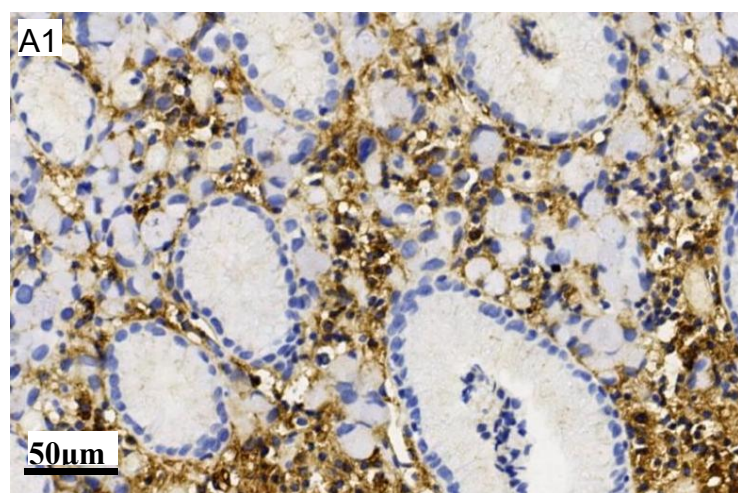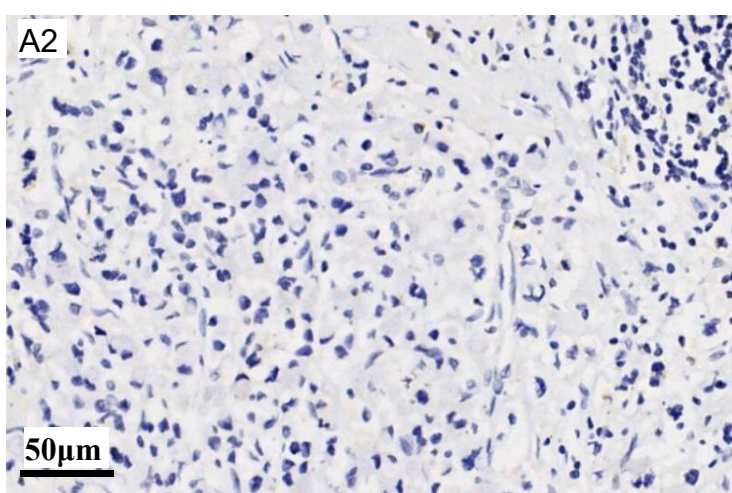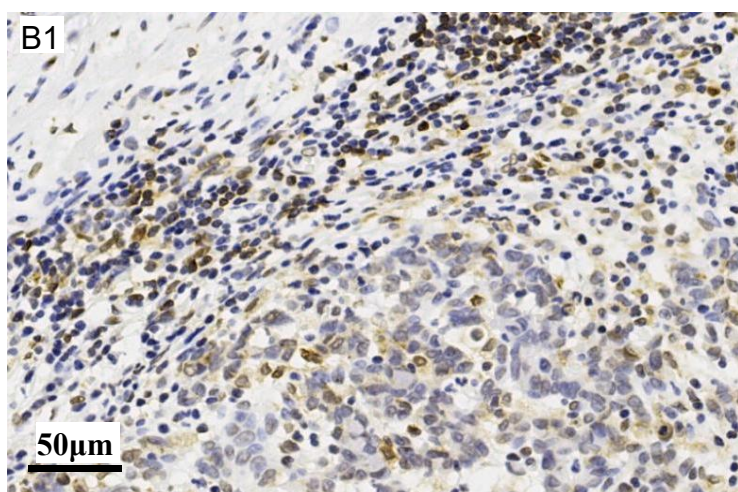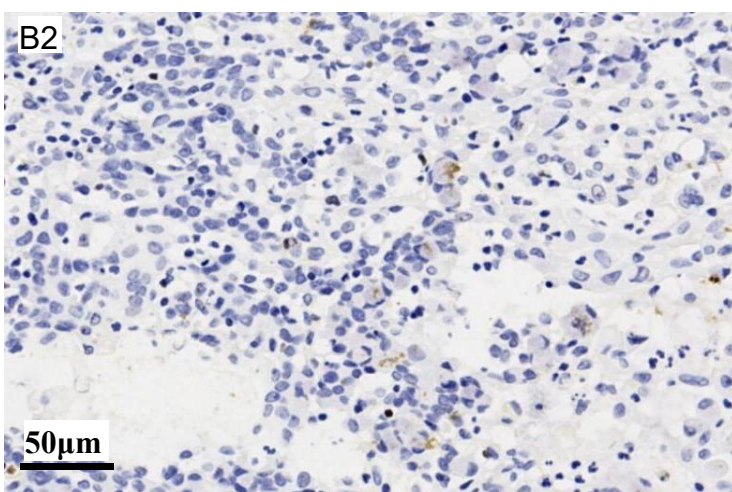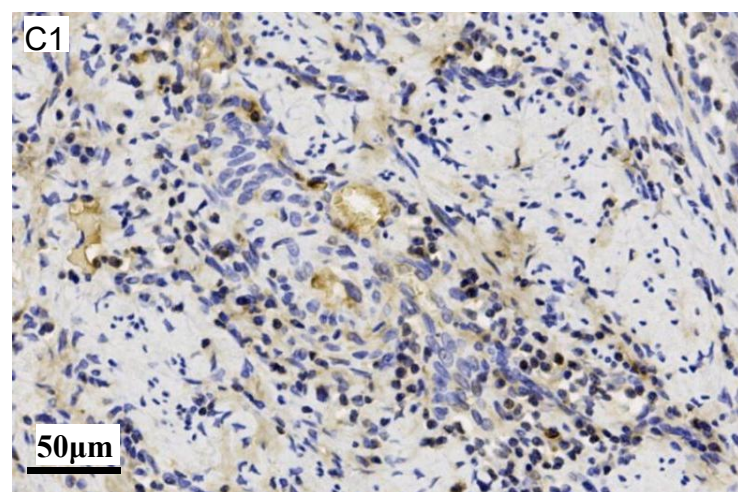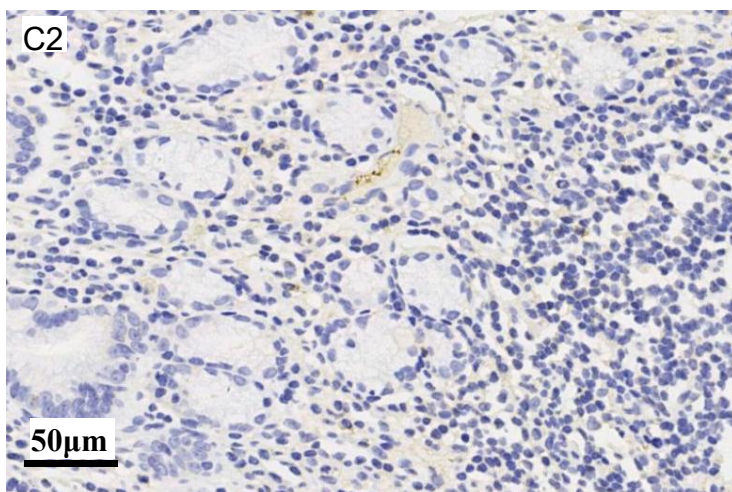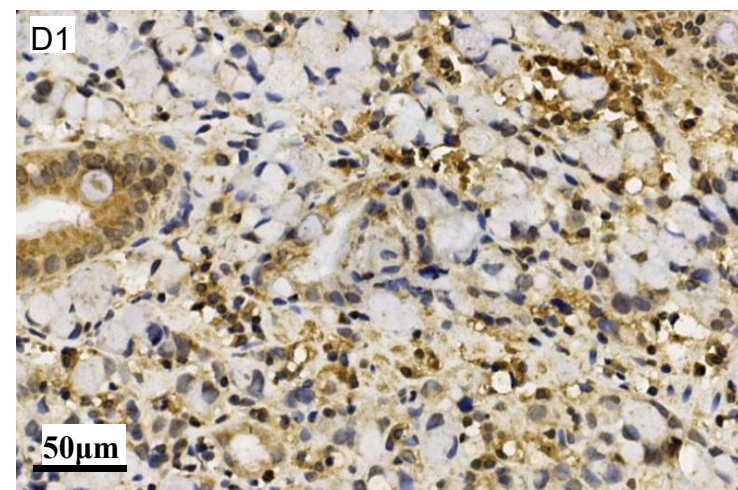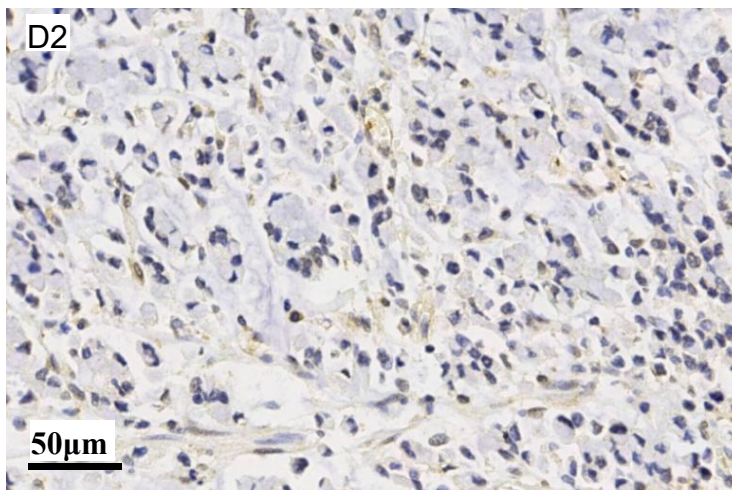

**Figure S5 The positive and negative expression of JCHAIN(A1/A2), CD74(B1/B2), FOXP3(C1/C2) and KLDR1(D1/D2) in GA (n=30). Scale bar: 50μm.**

**Supplementary Table 1 Table of basic information characteristics of each sample**

| Sample ID | Sex    | Age | Tumor or<br>Nomal | Histopathological<br>diagnosis | Lauren's<br>classification | Helicobacter<br>pylori | EBV | MMR  | HER-2 | Family<br>History | Cell<br>Number |
|-----------|--------|-----|-------------------|--------------------------------|----------------------------|------------------------|-----|------|-------|-------------------|----------------|
| MDA1      | Male   | 81  | Tumor             | MDA                            | Diffuse                    | (—)                    | (—) | dMMR | (—)   | (—)               | 6015           |
| MDA2      | Male   | 68  | Tumor             | MDA                            | Intestinal                 | (—)                    | (—) | pMMR | (—)   | (—)               | 14848          |
| MDA3      | Male   | 76  | Tumor             | MDA                            | Intestinal                 | (—)                    | (—) | pMMR | (+)   | (—)               | 13774          |
| PDA1      | Female | 57  | Tumor             | PDA                            | Intestinal                 | (—)                    | (—) | pMMR | (—)   | (—)               | 4684           |
| PDA2      | Male   | 52  | Tumor             | PDA                            | Intestinal                 | (—)                    | (—) | pMMR | (—)   | (—)               | 9462           |
| PDA3      | Male   | 65  | Tumor             | PDA                            | Diffuse                    | (—)                    | (—) | pMMR | (—)   | (—)               | 3111           |
| PDSRCC1   | Female | 57  | Tumor             | PDSRCC                         | Diffuse                    | (—)                    | (—) | pMMR | (—)   | (—)               | 9546           |
| PDSRCC2   | Female | 61  | Tumor             | PDSRCC                         | Diffuse                    | (—)                    | (—) | pMMR | (—)   | (—)               | 7747           |
| PDSRCC3   | Female | 52  | Tumor             | PDSRCC                         | Diffuse                    | (—)                    | (—) | pMMR | (—)   | (—)               | 6192           |
| GSRC1     | Female | 37  | Tumor             | SRCC                           | Diffuse                    | (—)                    | (—) | pMMR | (—)   | (—)               | 3128           |
| GSRC2     | Female | 48  | Tumor             | SRCC                           | Diffuse                    | (—)                    | (—) | pMMR | (—)   | (—)               | 19955          |
| GSRC3     | Male   | 67  | Tumor             | SRCC                           | Mixed                      | (—)                    | (—) | pMMR | (—)   | (—)               | 12830          |
| GSRC4     | Male   | 31  | Tumor             | SRCC                           | Diffuse                    | (—)                    | (—) | pMMR | (—)   | (—)               | 6034           |
| MDAN      | Male   | 81  | Nomal             |                                |                            |                        |     |      |       |                   | 7243           |
| PDAN1     | Female | 57  | Nomal             |                                |                            |                        |     |      |       |                   | 2383           |
| PDAN2     | Male   | 52  | Nomal             |                                |                            |                        |     |      |       |                   | 7251           |
| PDSRCCN   | Female | 57  | Nomal             |                                |                            |                        |     |      |       |                   | 7914           |
| GSRCN     | Female | 37  | Nomal             |                                |                            |                        |     |      |       |                   | 7665           |
